# Supplementary material
Source: PubMed Central journal article supplement (PMC10124917)
Supplement: mmc1.pdf [file mmc1.pdf]

## **Supporting Information**

Thymine DNA Glycosylase is an RNA-Binding Protein with High Selectivity for G-Rich Sequences

Lauren A. McGregor<sup>1</sup>, Baiyu Zhu<sup>1</sup>, Allison M. Goetz<sup>1</sup>, and Jonathan T. Sczepanski<sup>1,\*</sup>

<sup>1</sup>Department of Chemistry, Texas A&M University, College Station, Texas 77843

**S1. Supplementary Figures.**

**Figure S1**

**a**

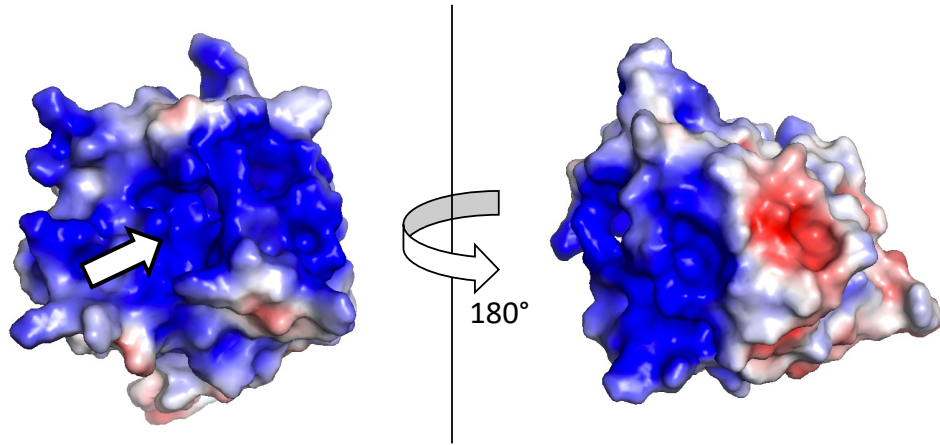

**b**

|            |                                                                                                                                                                                                                   |
|------------|-------------------------------------------------------------------------------------------------------------------------------------------------------------------------------------------------------------------|
| <b>NTD</b> | MEAENAGSYSLQQAQAFYTFPFQQLMAEAPNMAVVNEQQMPPEVPAPAPAQEPVQEAPKGR<br>KRKPRTTTEPKQPVEPKKPVESKKS GKSAKSKEKQEKITDTFKV KRKVDR                                                                                             |
| <b>CAT</b> | FNGVSEAELLTKLTPDILTFNLDIVIIGINPGLMAAYKGHHYPGPGNHFWKCLFMSGLSEVQLNH<br>MDDHTLPGKYGIGFTNMVERTTPGSKDLSSKEFREGGRILVQKLQKYQPRIAVFNGKCIYEIFSK<br>EVFGVKVKNLEFGLQPHKIPDTETLCYVMPSSARCAQFPRAQDKVHYYIKLKD LRDQLKGIER<br>NMD |
| <b>CTD</b> | VQEVQYTFDLQLAQEDAKKMAVKEEKYDPGYEAAYGGAYGENPCSSEPCGFSSNGLIESVELR<br>GESAFSGIPNGQWMTQSFTDQIPSF SNHCGTQE QEEESH A                                                                                                    |

**Figure S1.** (a) Electrostatic potential surface of TDG (catalytic domain, residues 111-308) determined from PDB ID:3UFJ.<sup>1</sup> Negative potentials are depicted by the red color and positive potentials by the blue color. The arrow indicates the active site. (b) Amino acid sequence of TDG, separated by the N-terminal domain (NTD), catalytic domain (CAT), and C-terminal domain (CTD). Cationic and polar residues are shown in blue and green text, respectively, for the disordered NTD and CTD.

**Figure S2**

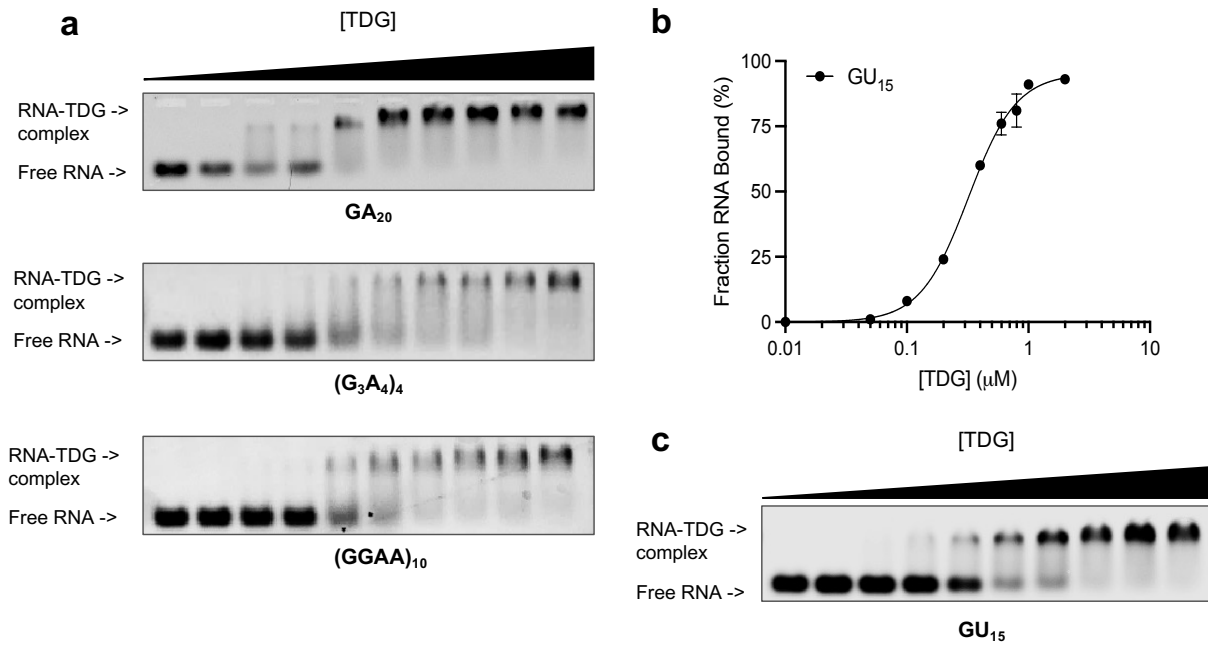

**Figure S2.** TDG binds preferentially to G-rich RNA *in vitro*. (a) Representative EMSA data for G-rich RNAs containing different arrangements of Gs and As binding to TDG (0 – 5  $\mu$ M). (b) Saturation plots for binding of TDG to  $GU_{15}$  RNA sequence. Data are mean  $\pm$  S.D. (n = 3). (c) Representative EMSA data for  $GU_{15}$  RNA sequence binding to TDG (0 – 2  $\mu$ M). Uncropped gel images are presented in Figure S13.

**Figure S3**

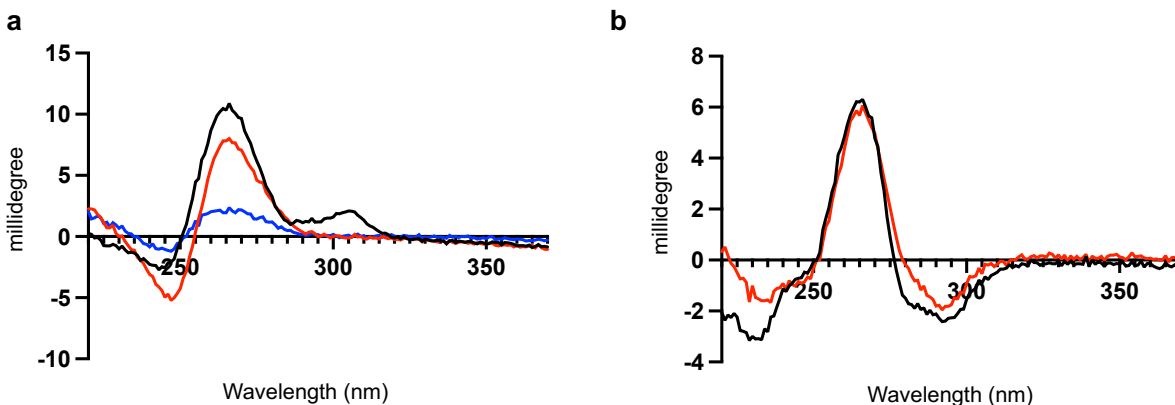

**Figure S3.** (a) Circular dichroism (CD) spectra of 5  $\mu$ M (GGAA)<sub>10</sub> (black), (G<sub>3</sub>A<sub>4</sub>)<sub>4</sub> (red) and (GA)<sub>20</sub> (blue) RNAs in a buffer containing 37.5 mM NaCl, 12.5 mM KCl, 10 mM HEPES (pH 7.8), 2.5 mM BME, and 5% glycerol. The CD spectra of (GGAA)<sub>10</sub> and (G<sub>3</sub>A<sub>4</sub>)<sub>4</sub> are consistent with a parallel G4 structure in the presence of K<sup>+</sup> as evident by a positive band at ~265 nm and a negative band at ~240 nm. These features are substantially reduced in (GA)<sub>20</sub>, indicating little to no G4 formation. (b) Circular dichroism (CD) spectra of 5  $\mu$ M CG<sub>HP</sub> (black) and MUT<sub>HP</sub> (red) RNAs in a buffer containing 37.5 mM NaCl, 12.5 mM KCl, 10 mM HEPES (pH 7.8), 2.5 mM BME, and 5% glycerol. The CD spectrum of confirms the formation of a hairpin structure as evident by a negative band at ~290 nm and a positive band at ~265 nm.

**Figure S4**

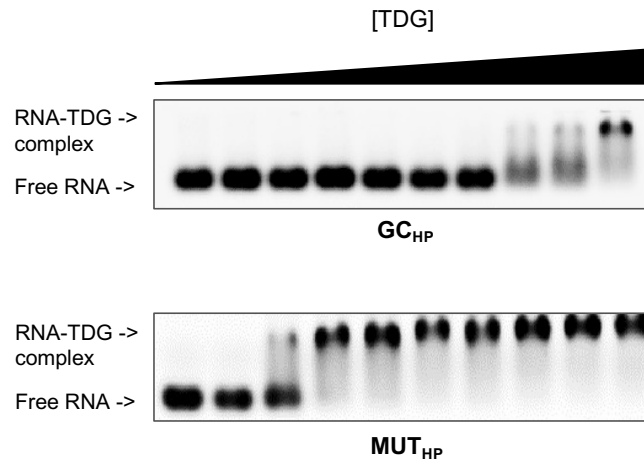

**Figure S4.** Representative EMSA data for  $CG_{HP}$  and  $MUT_{HP}$  RNAs binding to TDG (0 – 2  $\mu$ M) *in vitro*. Uncropped gel images are presented in Figure S14.

**Figure S5**

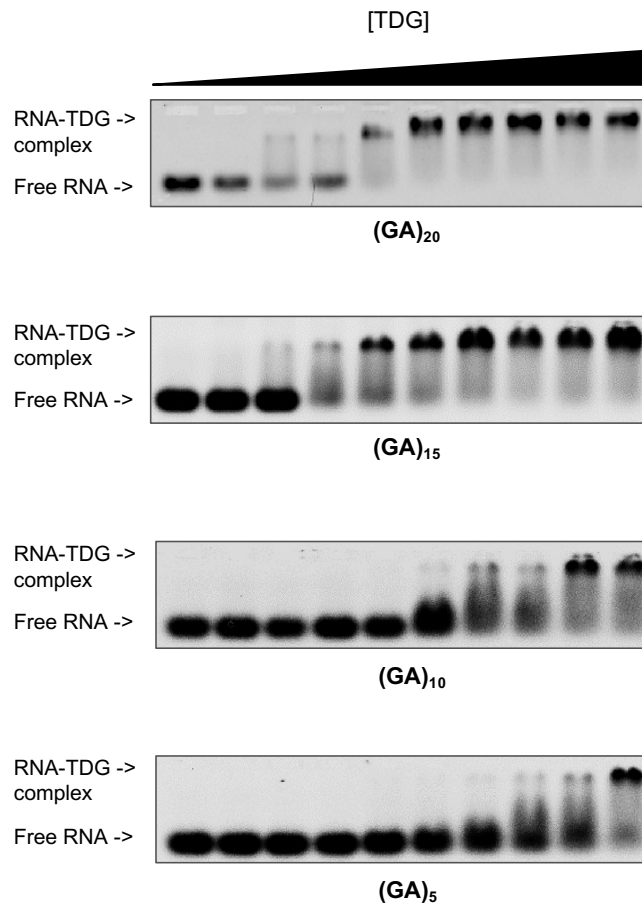

**Figure S5.** Representative EMSA data for (GA)<sub>20</sub> RNA and its truncations binding to TDG (0 – 2  $\mu$ M). Uncropped gel images are presented in Figure S15. The image for (GA)<sub>20</sub> was reused from Figure S2a and was positioned here to allow for the convenient visual comparison of (GA)<sub>20</sub> to its truncated variants.

**Figure S6**

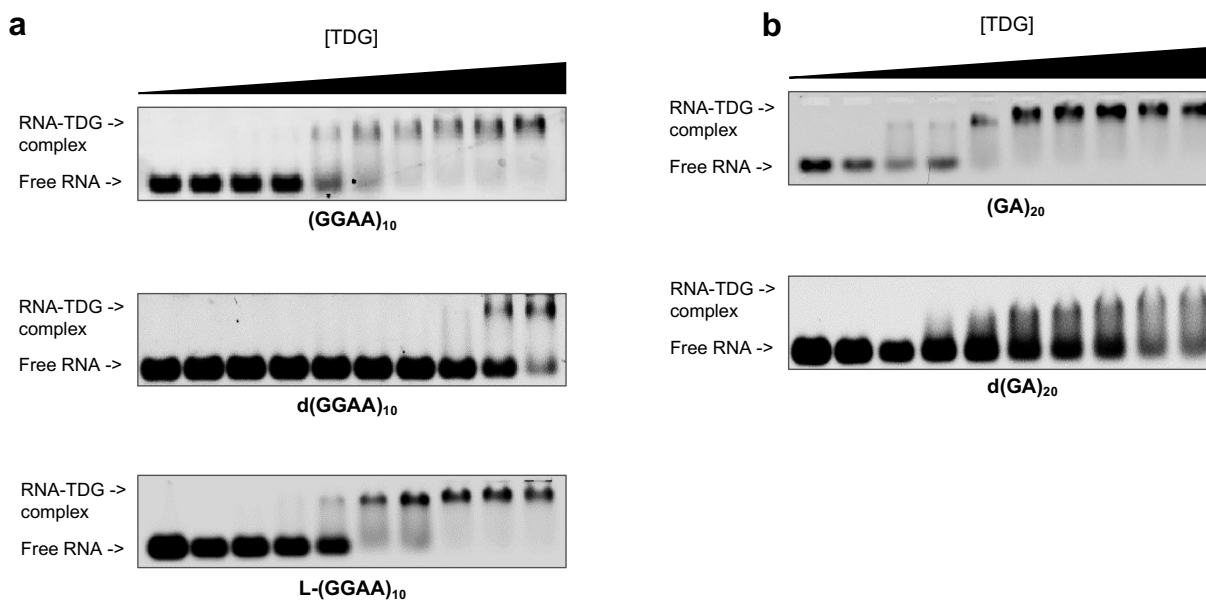

**Figure S6.** Representative EMSA data for  $(GGAA)_{10}$  (a) and  $(GA)_{20}$  (b) series of oligonucleotides binding to TDG *in vitro*. Uncropped gel images are presented in Figure S16. The image for  $(GGAA)_{10}$  in panel a was reused from Figure S2a and was positioned here to allow for the convenient visual comparison of  $(GGAA)_{10}$  to its DNA and L-DNA counterparts. The image for  $(GA)_{20}$  in panel b was reused from Figure S2a and was positioned here to allow for the convenient visual comparison of  $(GA)_{20}$  to its DNA counterpart  $d(GA)_{20}$ .

**Figure S7**

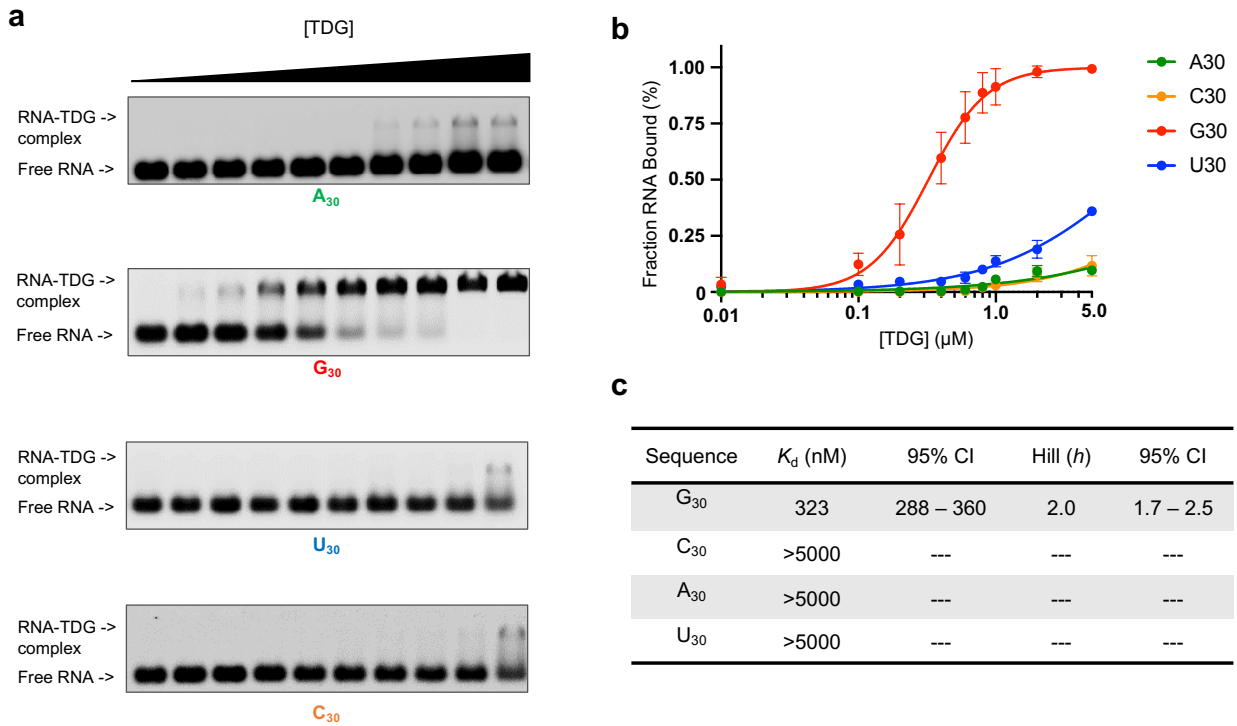

**Figure S7.** The influence of TDG's NTD deletion (TDG<sub>ΔN</sub>) on RNA binding. (a) Representative EMSAs for homopolymeric RNA sequences binding to TDG<sub>ΔN</sub>. Uncropped gel images are presented in Figure S17. (b) Saturation plots for binding of TDG<sub>ΔN</sub> binding to homopolymeric RNAs. Data are mean  $\pm$  S.D. ( $n = 3$ ). (c) Equilibrium dissociation constants and Hill coefficients ( $h$ ) for TDG<sub>ΔN</sub> binding to various RNAs. 95% confidence interval (95% CI).



**Figure S8**

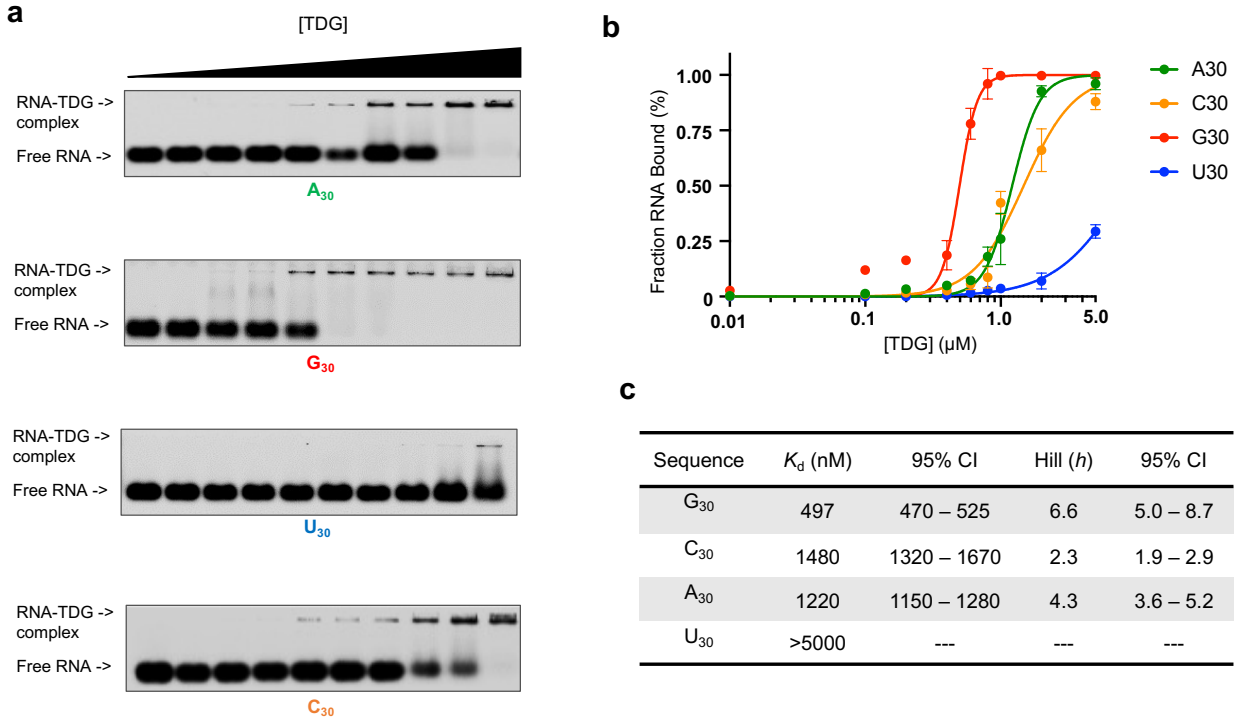

**Figure S8.** The influence of TDG’s catalytic domain (TDG<sub>CAT</sub>) on RNA binding. (a) Representative EMSAs for homopolymeric RNA sequences binding to TDG<sub>CAT</sub>. Uncropped gel images are presented in Figure S18. (b) Saturation plots for binding of TDG<sub>CAT</sub> binding to homopolymeric RNAs. Data are mean  $\pm$  S.D. ( $n = 3$ ). (c) Equilibrium dissociation constants and Hill coefficients ( $h$ ) for TDG<sub>CAT</sub> binding to various RNAs. 95% confidence interval (95% CI).

**Figure S9**

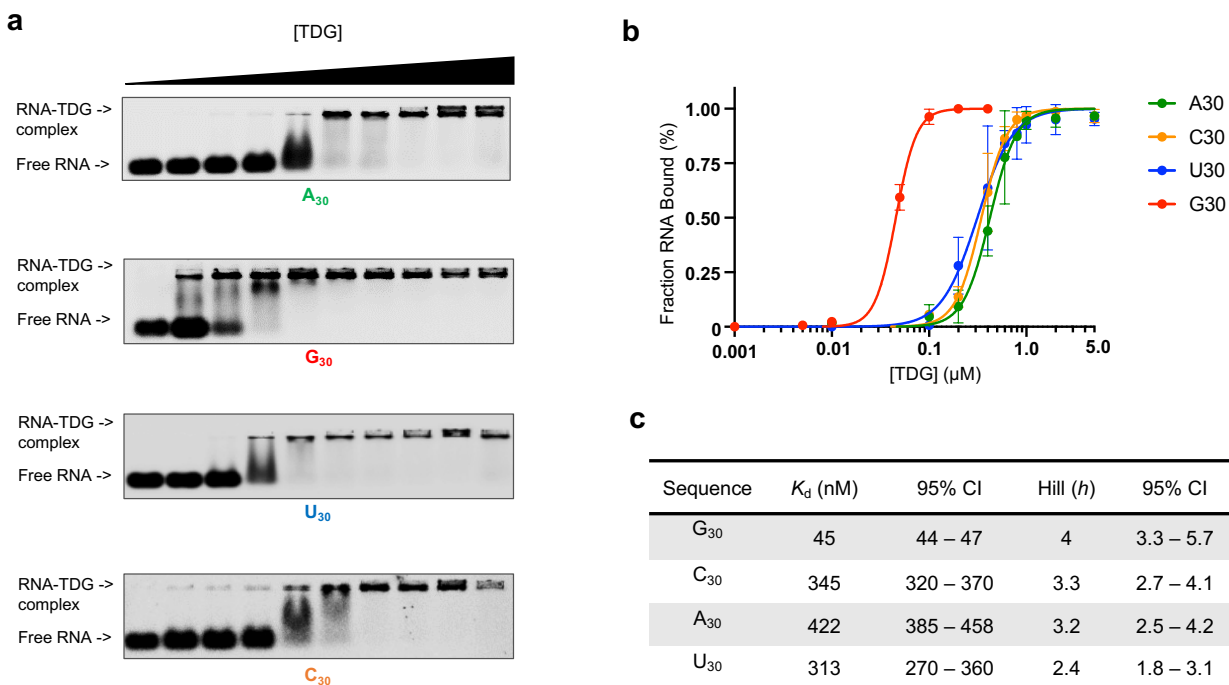

**Figure S9.** The influence of TDG's CTD deletion (TDG<sub>ΔC</sub>) on RNA binding. (a) Representative EMSAs for homopolymeric RNA sequences binding to TDG<sub>ΔC</sub>. Uncropped gel images are presented in Figure S19. (b) Saturation plots for binding of TDG<sub>ΔC</sub> binding to homopolymeric RNAs. Data are mean  $\pm$  S.D. ( $n = 3$ ). (c) Equilibrium dissociation constants and Hill coefficients ( $h$ ) for TDG<sub>ΔC</sub> binding to various RNAs. 95% confidence interval (95% CI).

Figure S10

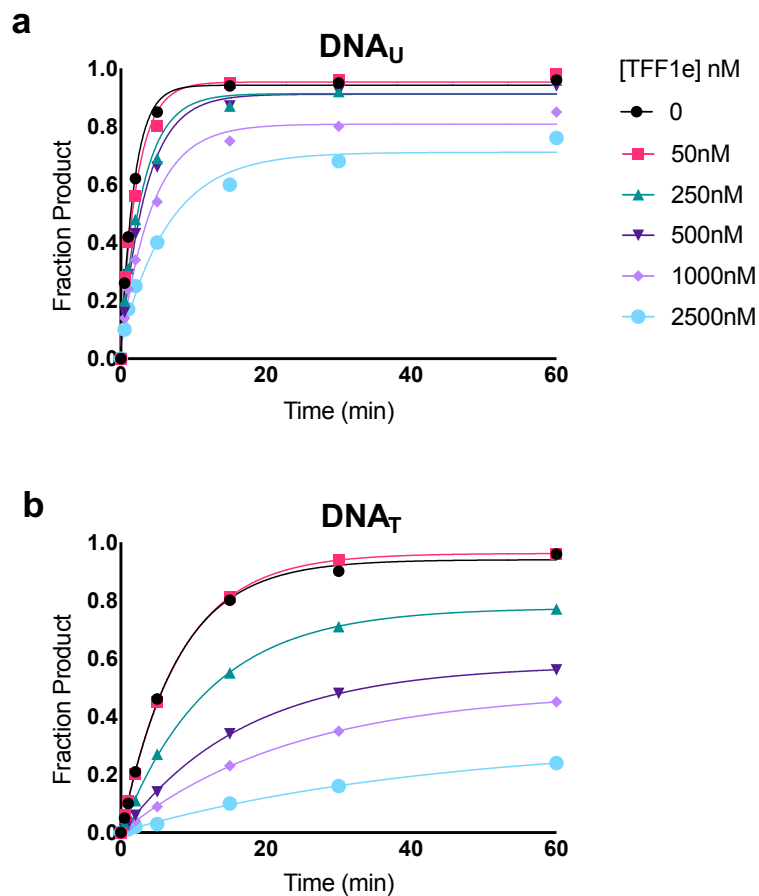

**Figure S10.** Excision of DNA<sub>U</sub> (a) and DNA<sub>T</sub> (b) mismatched substrates by TDG is inhibited by native TFF1e RNA. (a) TDG-mediated excision of G•U mismatch is inhibited by TFF1e RNA as concentration of RNA increased. (b) TDG-mediated excision of G•T mismatch is inhibited by TFF1e RNA, drastically. For each reaction, the DNA substrate (100 nM) was mixed with the indicated concentration of G<sub>30</sub> RNA followed by the addition of TDG (200 nM).

**Figure S11**

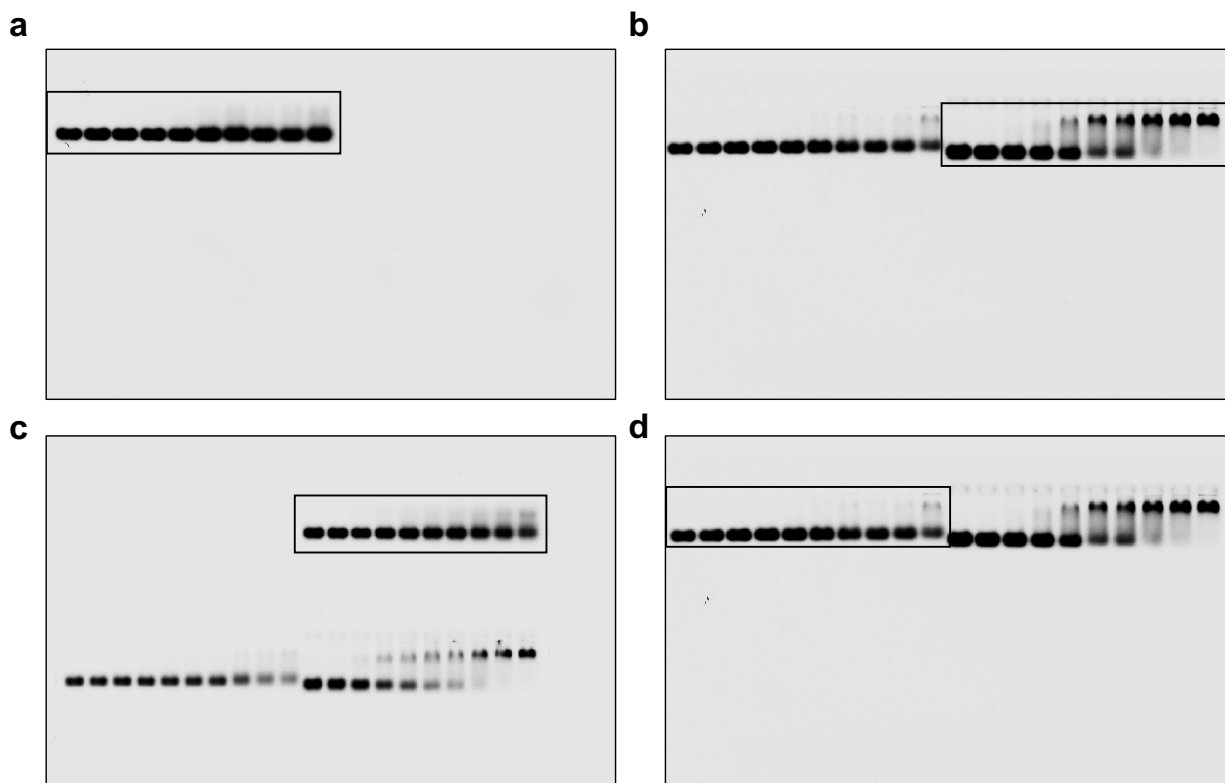

**Figure S11.** Uncropped gel images for main text Figure 1a. (a)  $A_{30}$ . (b)  $G_{30}$ . (c)  $U_{30}$ . (d)  $C_{30}$ . Frame indicates the cropped region shown in Figure 1a. The gel in panel c has unrelated experiments originating from wells at the midpoint of the gel.

**Figure S12**

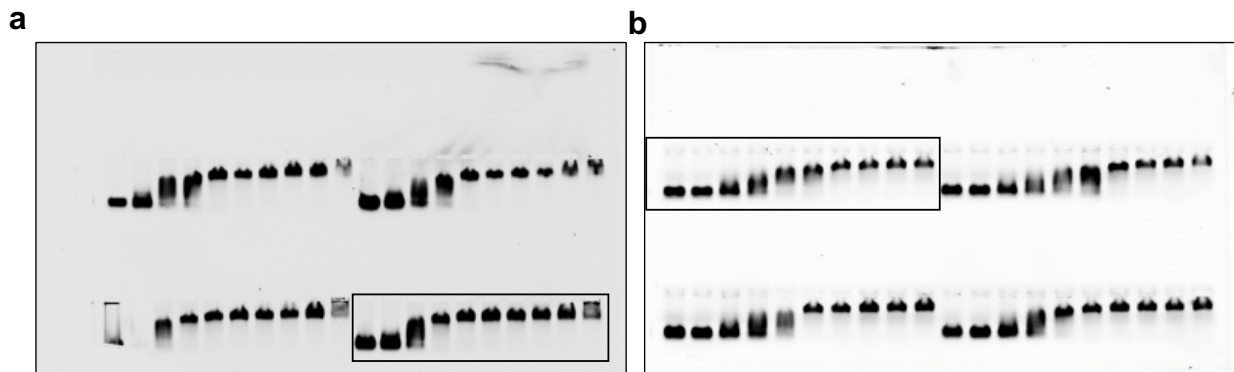

**Figure S12.** Uncropped gel images for main text Figure 4a. (a) HOTAIR. (b) TFF1e. Frame indicates the cropped region shown in Figure 4a. The gel in panel a has unrelated experiments originating from wells at the top of the gel. The gel in panel b has unrelated experiments originating from wells at the midpoint of the gel.

**Figure S13**

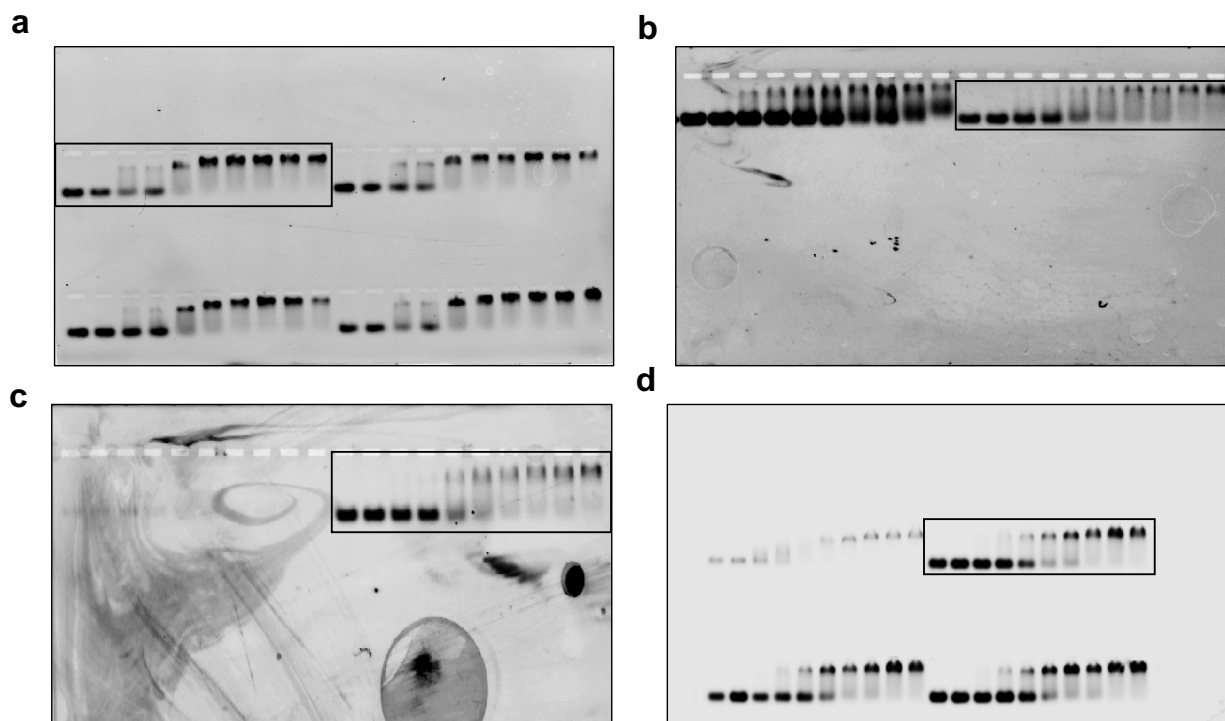

**Figure S13.** Uncropped gel images for Figure S2a,c. (a)  $GA_{20}$ . (b)  $(G_3A_4)_4$ . (c)  $(GGAA)_{10}$ . (d)  $GU_{15}$ . Frame indicates the cropped region shown in Figure S2a,c. The gels in panels a and d have unrelated experiments originating from wells at the midpoint of the gel.

**Figure S14**

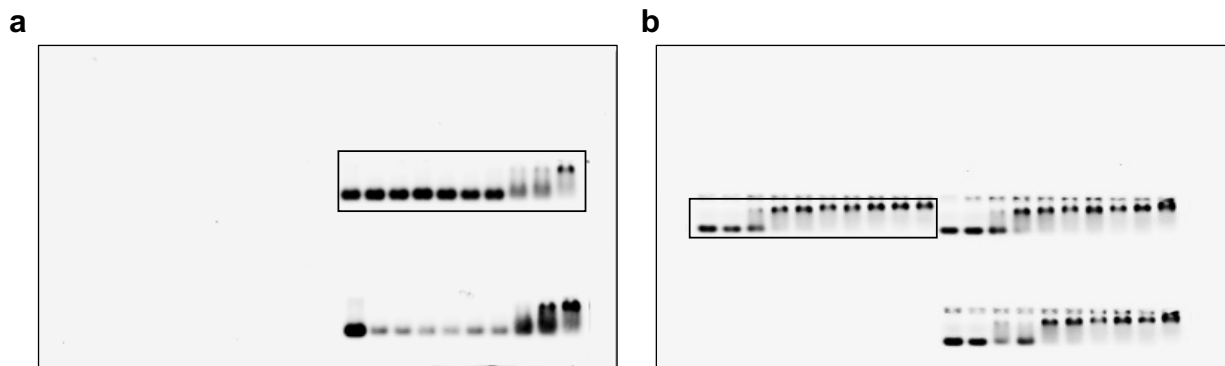

**Figure S14.** Uncropped gel images for Figure S4. (a)  $GC_{HP}$ . (b)  $MUT_{HP}$ . Frame indicates the cropped region shown in Figure S4. Gels have unrelated experiments originating from wells at the midpoint of the gel.

**Figure S15**

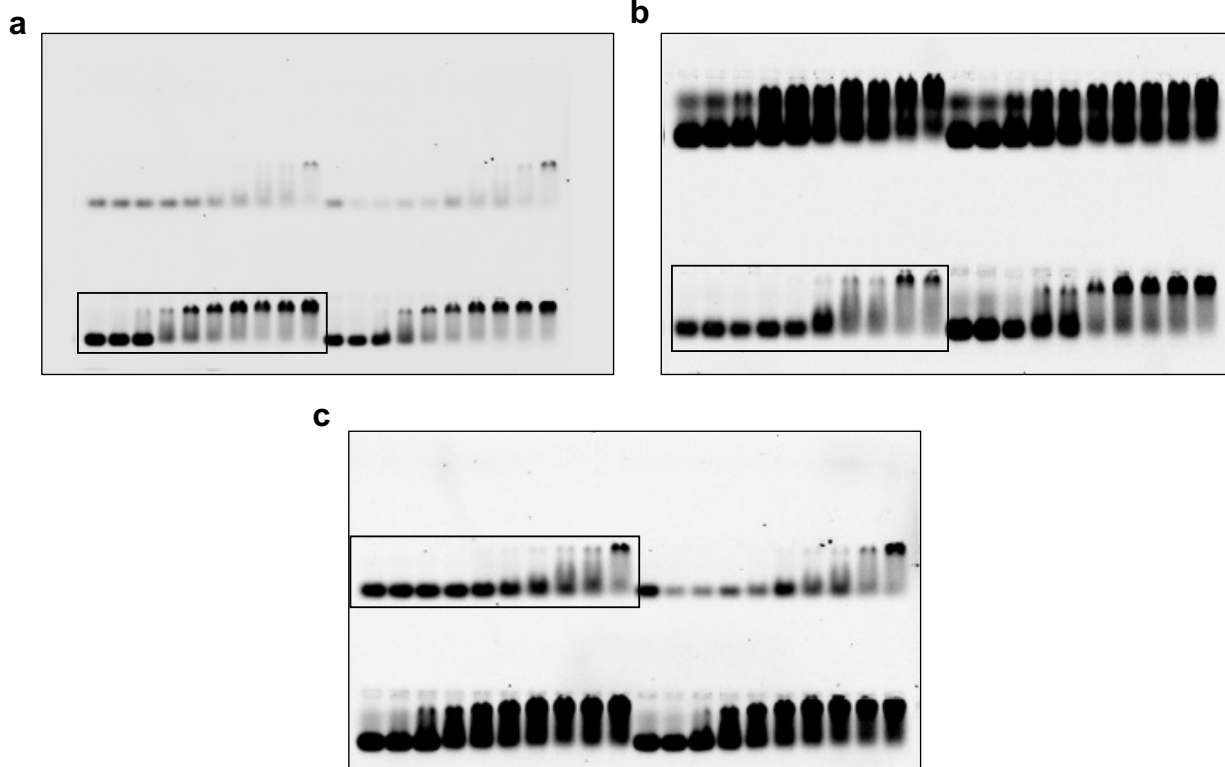

**Figure S15.** Uncropped gel images for Figure S5. (a)  $(GA)_{15}$ . (b)  $(GA)_{10}$ . (c)  $(GA)_5$ . Frame indicates the cropped region shown in Figure S5. The gel in panels c has unrelated experiments originating from wells at the midpoint of the gel. The gels in panels a and b have unrelated experiments originating from wells at the top of the gel.



**Figure S16**

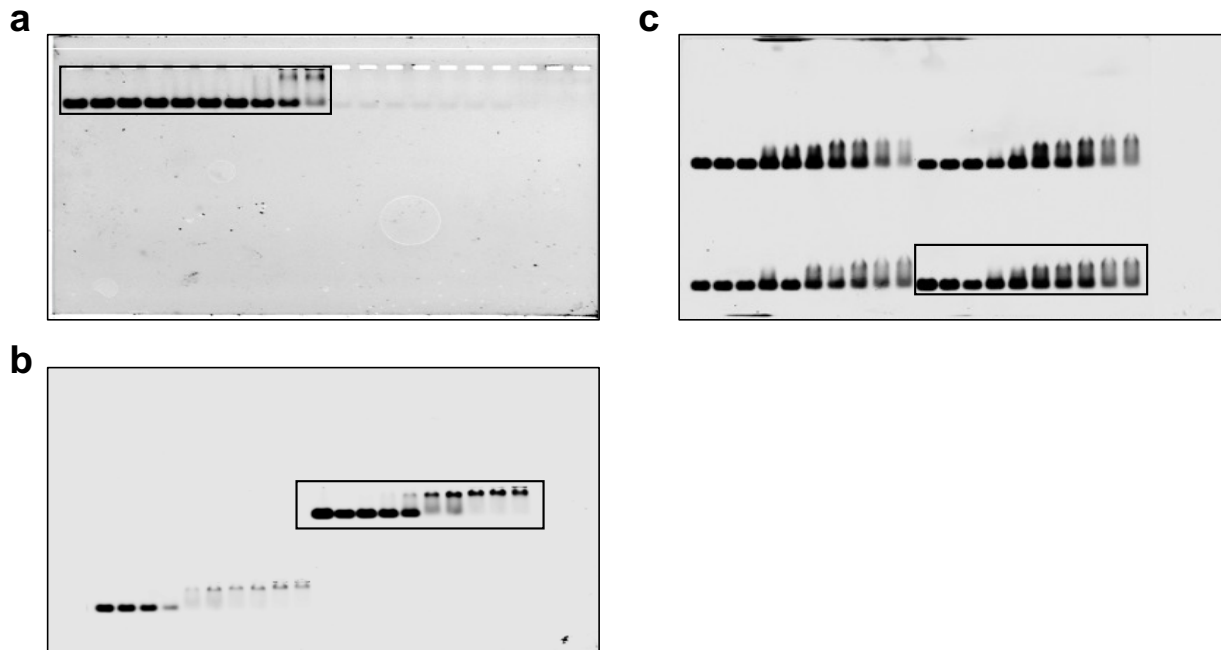

**Figure S16.** Uncropped gel images for Figure S6. (a)  $d(GGAA)_{10}$ . (b)  $L-(GGAA)_{10}$ . (c)  $d(GA)_{20}$ . Frame indicates the cropped region shown in Figure S6. The gel in panels b has unrelated experiments originating from wells at the midpoint of the gel. The gel in panel c has unrelated experiments originating from wells at the top of the gel.

**Figure S17**

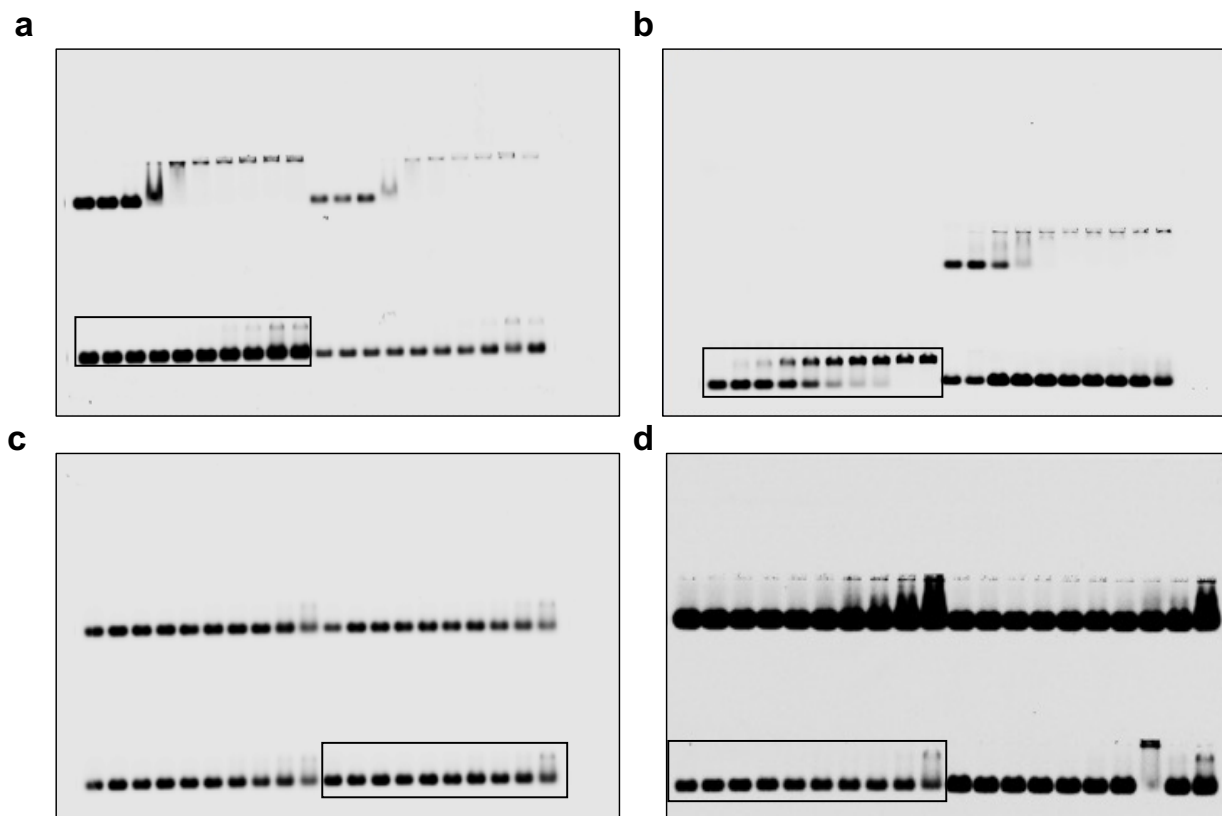

**Figure S17.** Uncropped gel images for Figure S7a. (a)  $A_{30}$ . (b)  $G_{30}$ . (c)  $U_{30}$ . (d)  $C_{30}$ . Frame indicates the cropped region shown in Figure S7a. The gels have unrelated experiments originating from wells at the top of the gel.

**Figure S18**

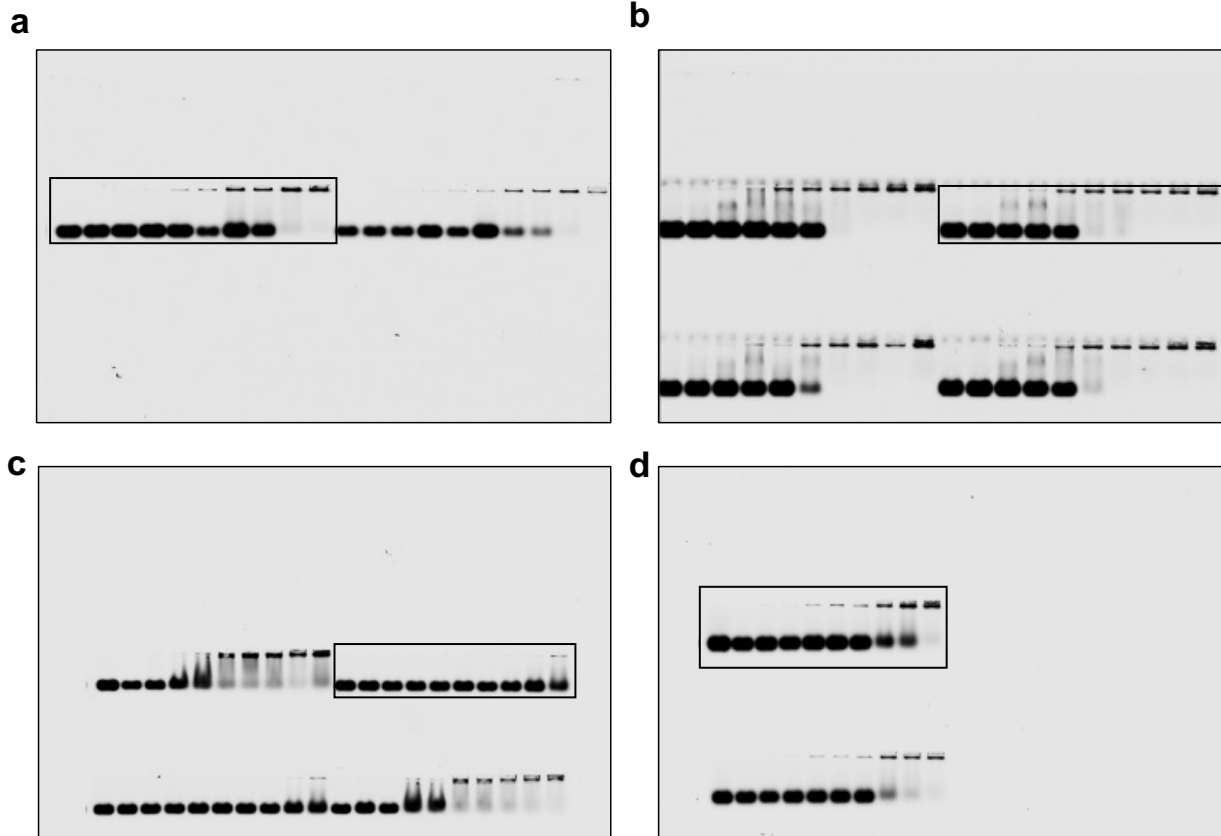

**Figure S18.** Uncropped gel images for Figure S8a. (a) A<sub>30</sub>. (b) G<sub>30</sub>. (c) U<sub>30</sub>. (d) C<sub>30</sub>. Frame indicates the cropped region shown in Figure S8a. The gel in panel b has unrelated experiments originating from wells at the top of the gel. The gels in panels c and d have unrelated experiments originating from wells at the midpoint of the gel.

**Figure S19**

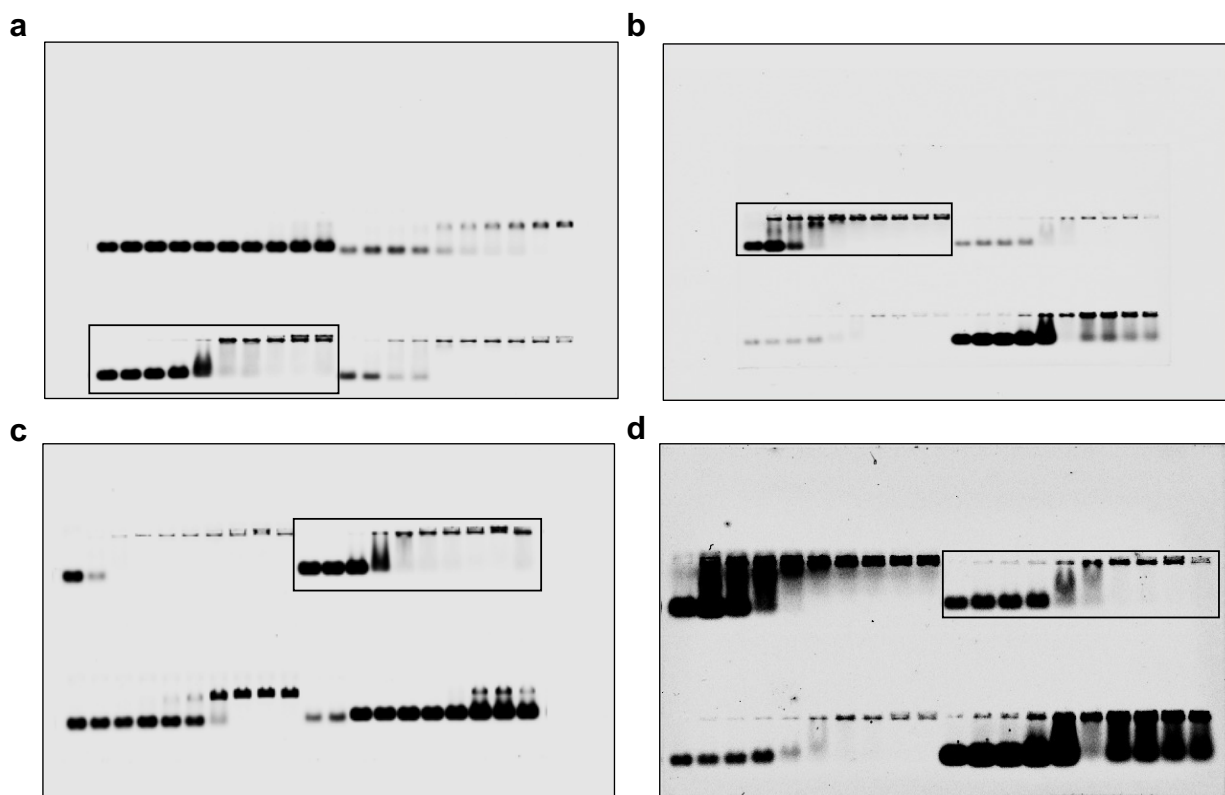

**Figure S19.** Uncropped gel images for Figure S9a. (a)  $A_{30}$ . (b)  $G_{30}$ . (c)  $U_{30}$ . (d)  $C_{30}$ . Frame indicates the cropped region shown in Figure S9a. The gel in panel a has unrelated experiments originating from wells at the top of the gel. The gels in panels b, c and d have unrelated experiments originating from wells at the midpoint of the gel.

**Figure S20**

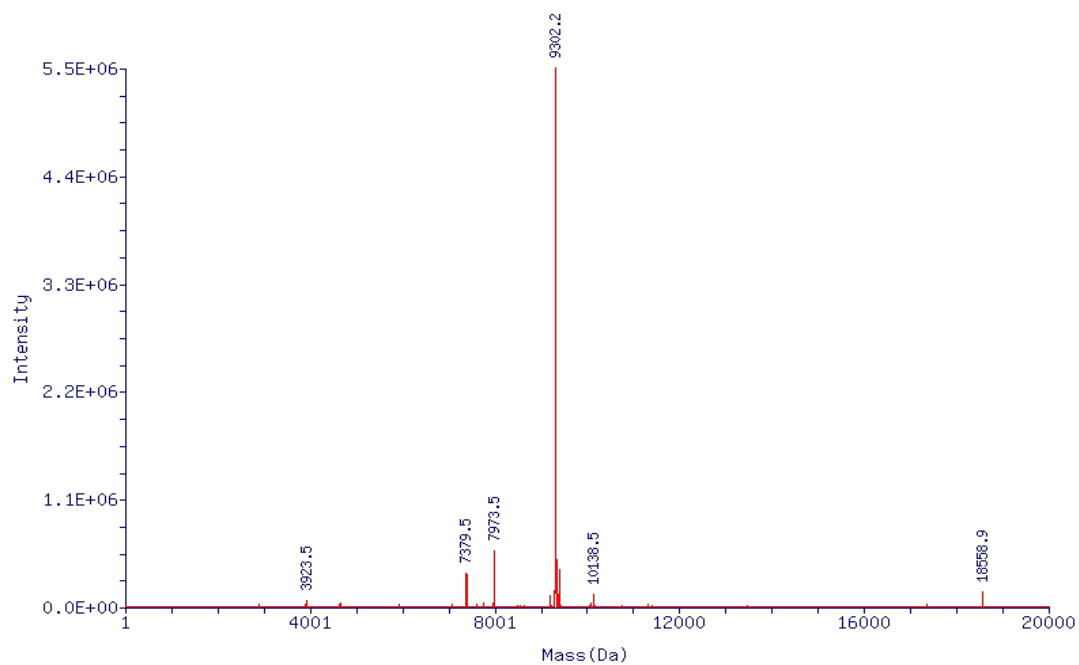

**Figure S20.** ESI-MS spectra of  $U_{30}$  prepared by solid-phase synthesis. Mass calculated: 9,302.3 Da; Mass found: 9,302.2 Da.

**Figure S21**

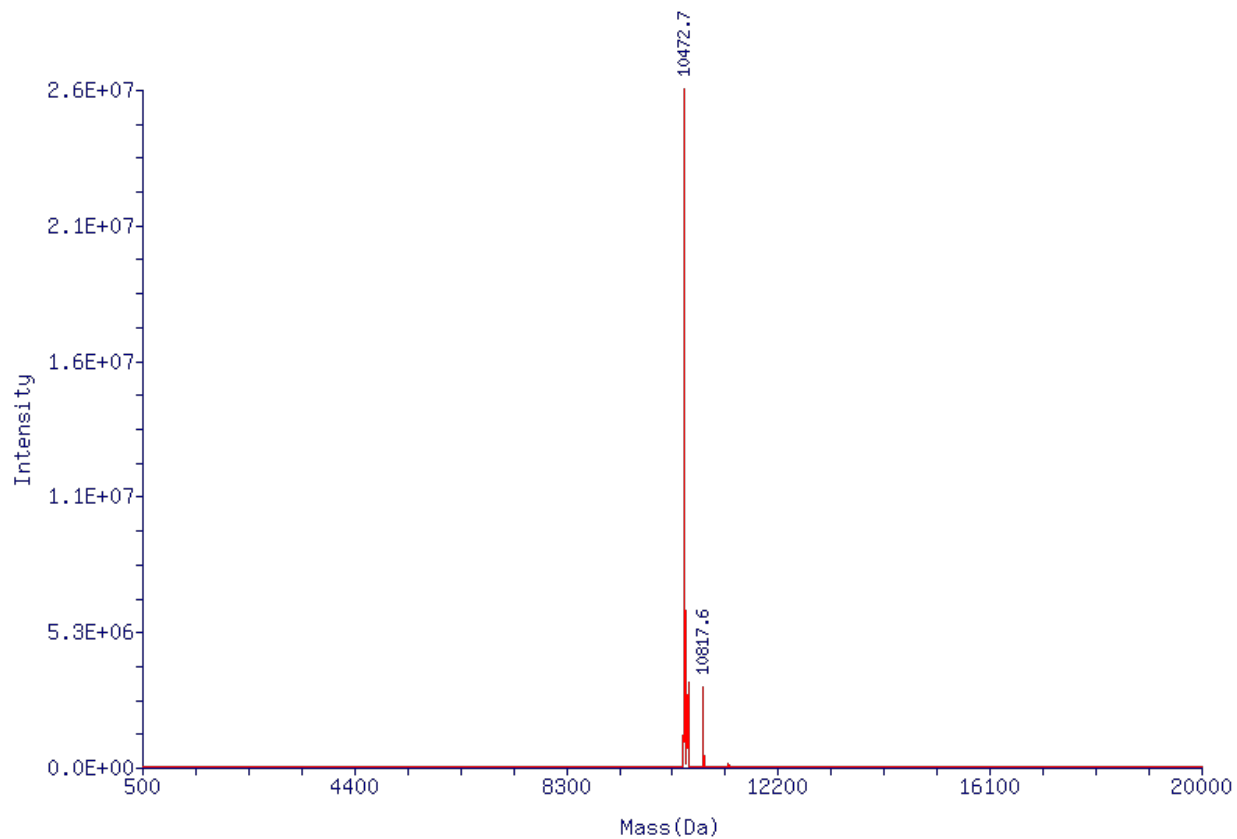

**Figure S21.** ESI-MS spectra of  $G_{30}$  prepared by solid-phase synthesis. Mass calculated: 10,473.4 Da; Mass found: 10,472.7 Da.

**Figure S22**

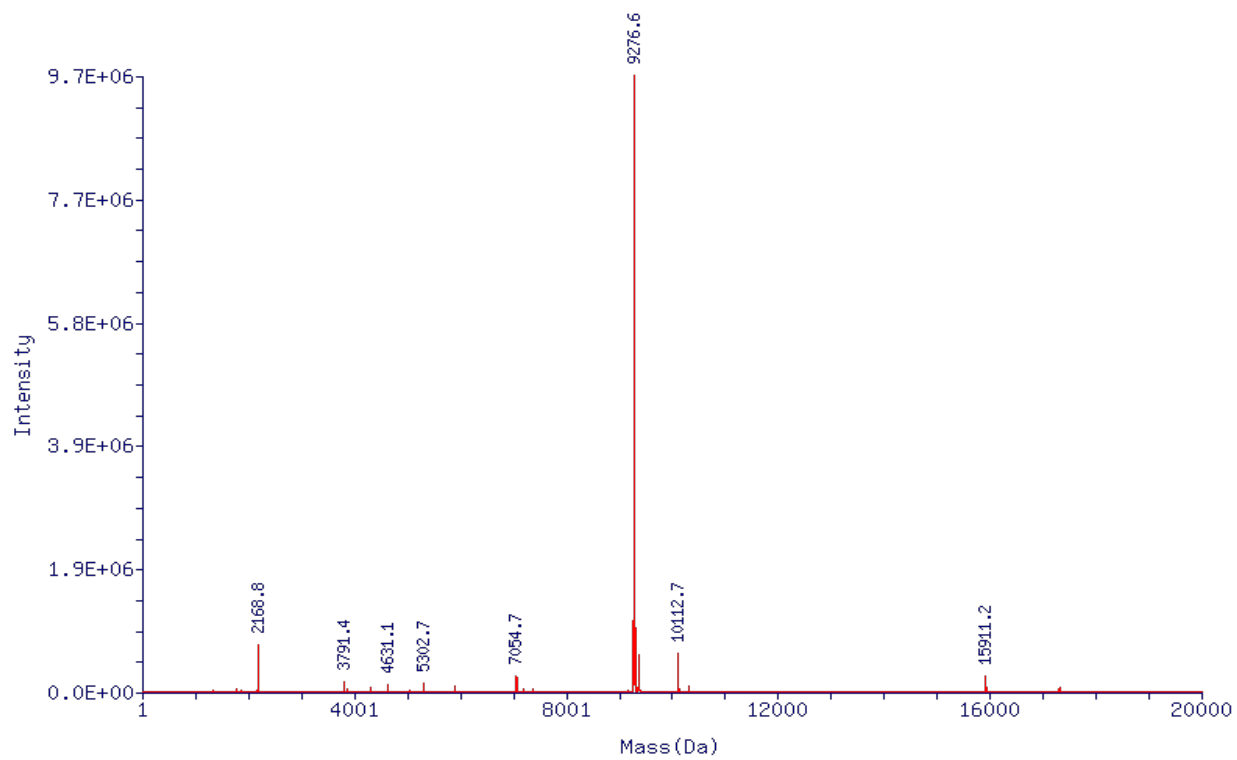

**Figure S22.** ESI-MS spectra of C<sub>30</sub> prepared by solid-phase synthesis. Mass calculated: 9272.65 Da; Mass found: 9,276.6 Da.

**Figure S23**

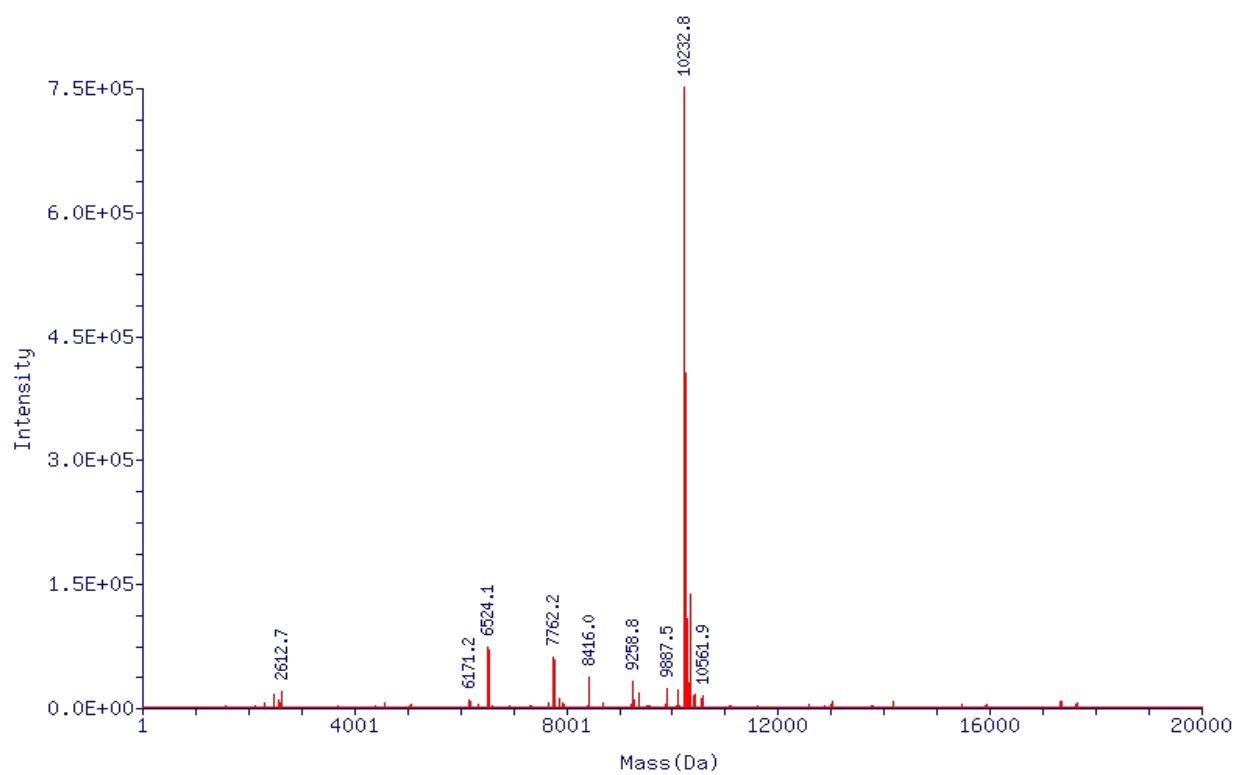

**Figure S23.** ESI-MS spectra of (GA)<sub>15</sub> prepared by solid-phase synthesis. Mass calculated: 10,233.45 Da; Mass found: 10,232.8 Da.



**Figure S24**

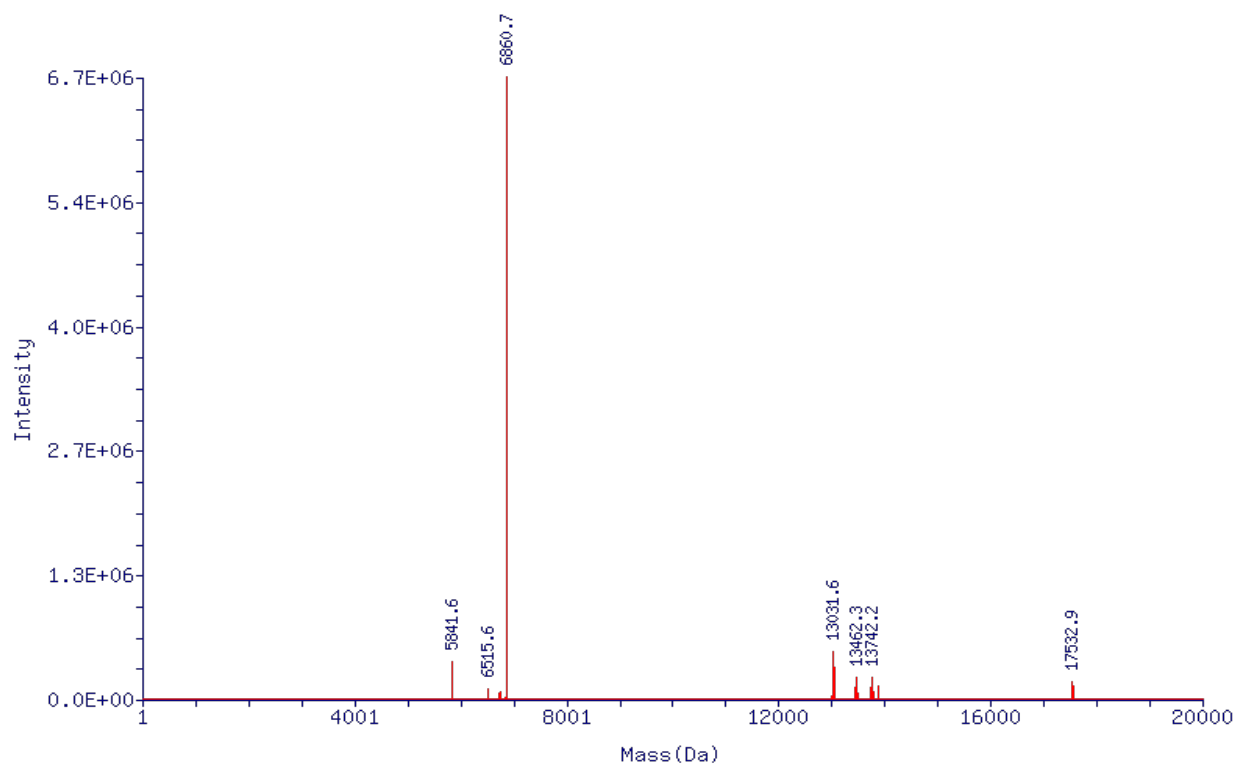

**Figure S24.** ESI-MS spectra of (GA)<sub>10</sub> prepared by solid-phase synthesis. Mass calculated: 6861.35 Da; Mass found: 6860.7 Da.

**Figure S25**

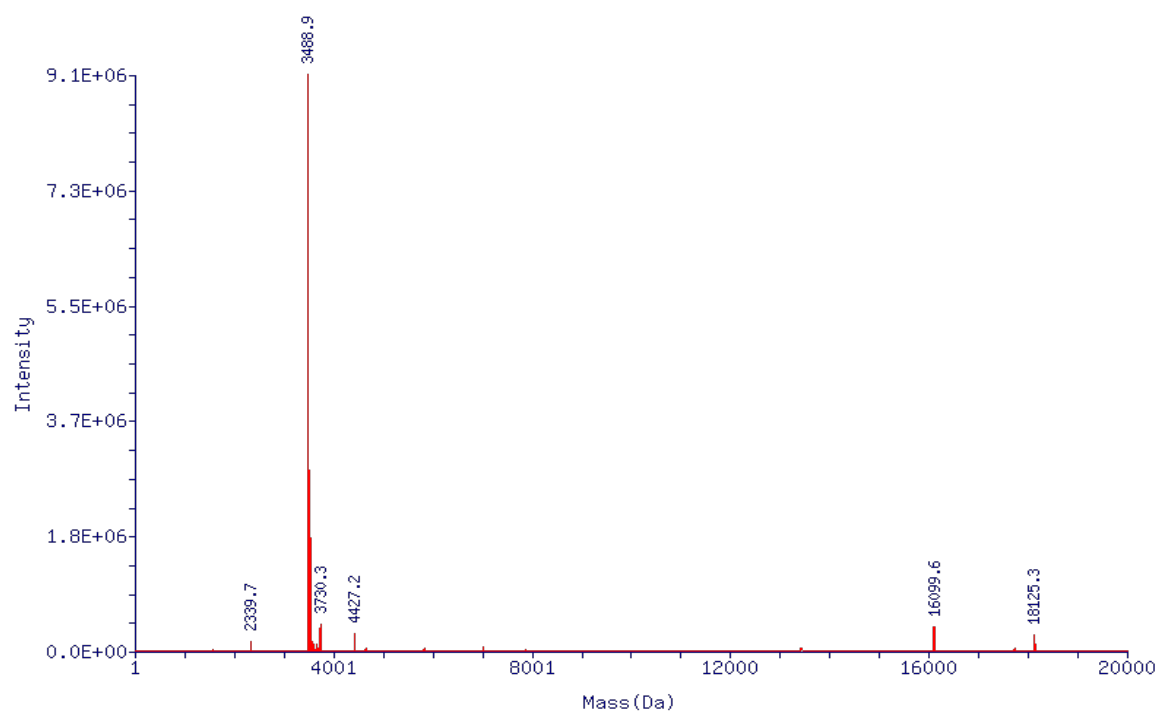

**Figure S25.** ESI-MS spectra of (GA)<sub>5</sub> prepared by solid-phase synthesis. Mass calculated: 3,489.25 Da; Mass found: 3,488.9 Da.

**Figure S26**

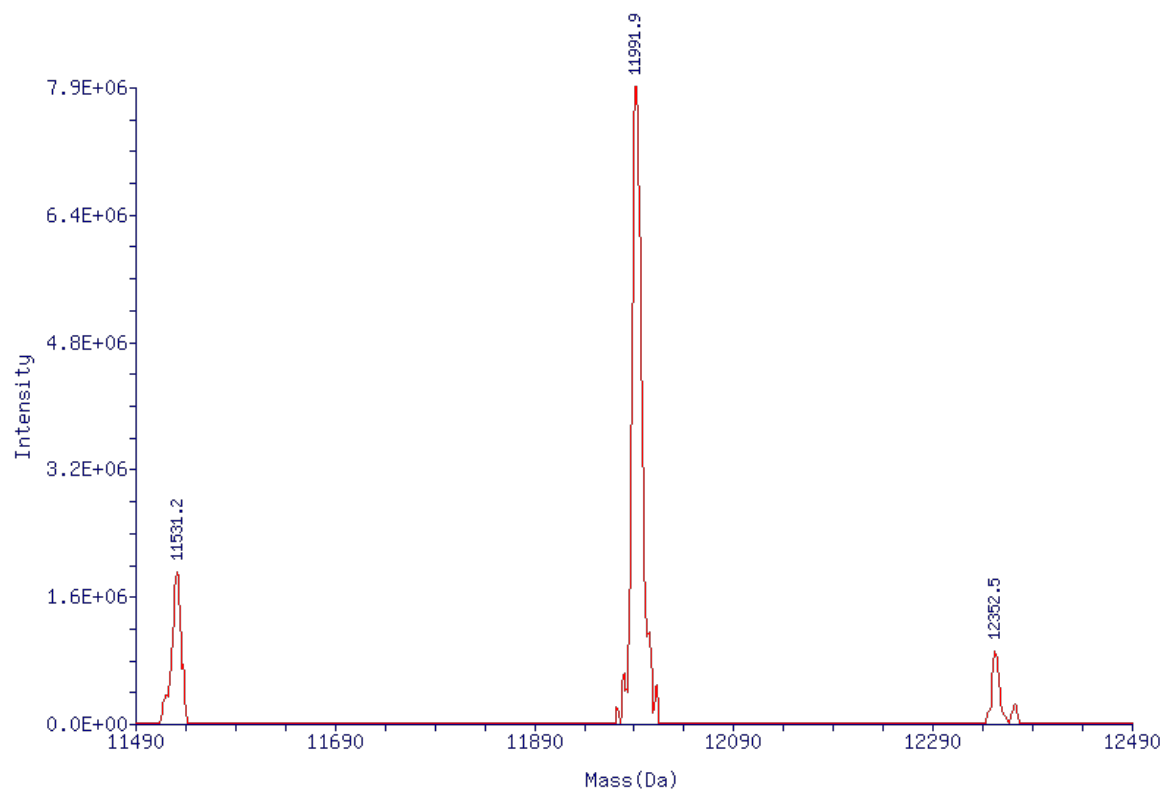

**Figure S26.** ESI-MS spectra of MUT<sub>HP</sub> prepared by solid-phase synthesis. Mass calculated: 11992.35 Da; Mass found: 11991.9 Da.

**Figure S27**

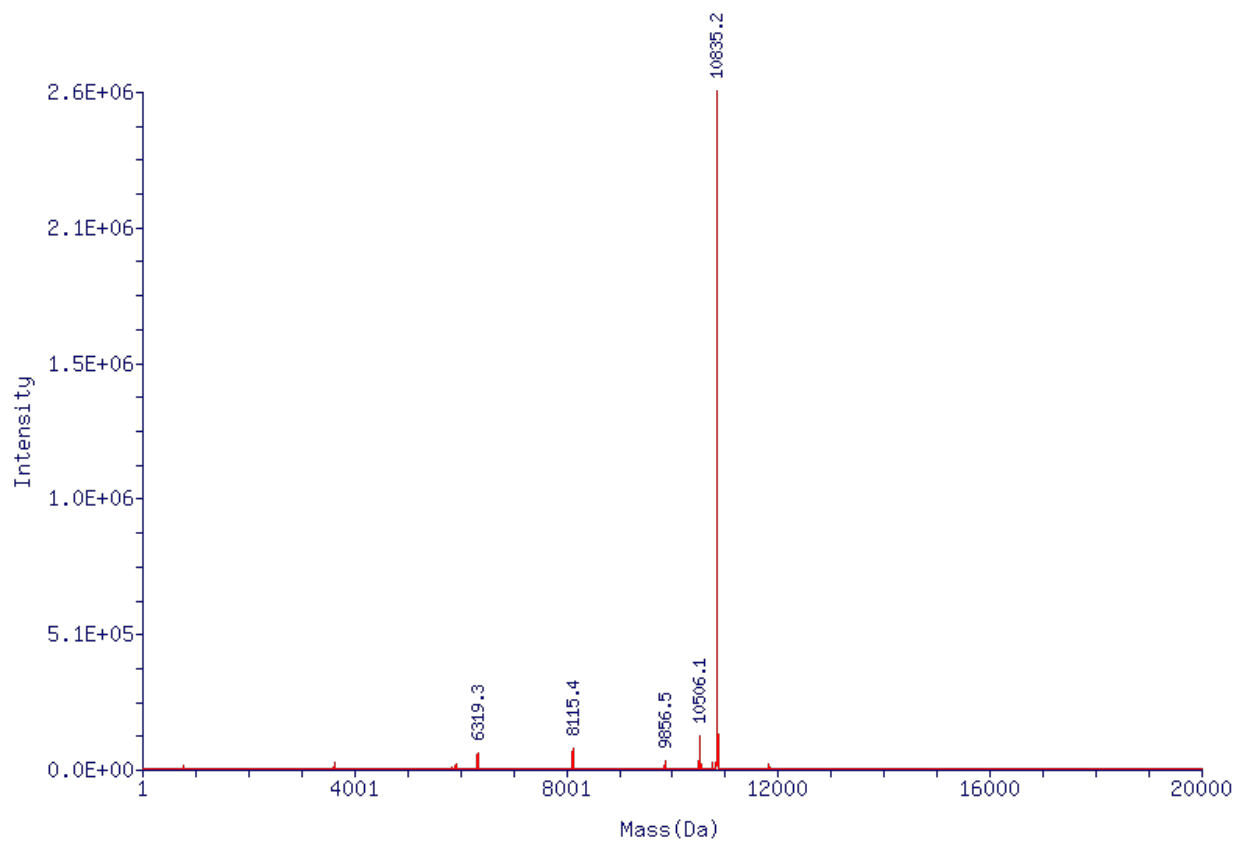

**Figure S27.** ESI-MS spectra of <sup>F</sup>U prepared by solid-phase synthesis. Mass calculated: 10,835.1 Da; Mass found: 10835.2 Da.



**Table S2.** Names and sequences of primers used for HOTAIR and TFF1e DNAs and RNAs.

| Sequence Name | Sequence Identity 5'→3'                      | DNA/RNA |
|---------------|----------------------------------------------|---------|
| TFF1eFWD      | TTCTAATACGACTCACTATAGGGCTTTTGACCCTAAGGTCCCTT | DNA     |
| TFF1eREV      | CTCTCATCCCTGGCTCCCAG                         | DNA     |
| HOTAIRFWD     | TTCTAATACGACTCACTATAGAGCCAGAGTTACAGACGG      | DNA     |
| HOTAIRREV     | GCCCCTCCTTCTCTCGCCGCCGTCTGTA ACTCTGGGCTC     | DNA     |

**Table S3.** Names and sequences of lncRNA fragments and the corresponding DNA templates used to prepared them. T7 promoter sequence is underlined.

| Name           | Sequence                                                                                                                                                                                                                                                                                                                                                                                                                                                                      |
|----------------|-------------------------------------------------------------------------------------------------------------------------------------------------------------------------------------------------------------------------------------------------------------------------------------------------------------------------------------------------------------------------------------------------------------------------------------------------------------------------------|
| TFF1e-DNA      | TTCT <u>AATACGACTCACTATA</u> GGGCTTTTGACCCTAAGGTCCCTTAAATGCA<br>ACCCTGGTCTTGCTATAAAAACCAGGGCGTGACCCAGTGGTTGTCAATTC<br>AGCAGCAGTGACTTGGTGGCTCCAGGGTGTGACGACGCTTGTGCTGAAAA<br>CAGAGATCACAGCTAGTCCTGGGCAGCTCTGGGTGGGTGCAGCCTGGCA<br>GGCAGAGGAGCTGGGGCCCGGGAGGAAGAAGGAGCCTCACGACATGGG<br>AAAGGAGGAGGCAGCGAGGAGGAGCCCCTGCTGGGATGGGGATGGGTC<br>GGGCGTGCCCCGTGTGCCAGGAGCAGGGAGAAAGTGGGAGGGGGCGG<br>GGGGCTGAGACAGTGCGGGAGAGGACCTTGCCTGCCTGCTGAGGGGCT<br>GGAACCTCGCTGGGAGCCAGGGATGAGAG |
| TFF1e RNA      | GGGCUUUUGACCCUAAGGUCCCUUAAAUGCAACCCUGGUCUUGCUAUA<br>AAAACCAGGGCGUGACCCAGUGGUUUGUCAAUUCAGCAGCAGUGACUUG<br>GUGGCUCCAGGGUGUCAGACGCUUGUGCUGAAAACAGAGAUCACAGCU<br>AGUCCUGGGCAGCUCUGGGUGGGUGCAGCCUGGCAGGCAGAGGAGCU<br>GGGGCCCGGGAGGAAGAAGGAGCCUCACGACAUGGGAAAGGAGGAGG<br>CAGCGAGGAGGAGCCCCUGCUGGGAUGGGGAUGGGUCGGGGCGUGCCC<br>CGUGUGCCAGGAGCAGGGAGAAAGUGGGAGGGGGCGGGGGGCUGAGA<br>CAGUGC GGGAGAGGACCUUGCCUGCCUGCUGAGGGGGCUGGAACCUCG<br>CUGGGAGCCAGGGAUGAGAG                           |
| HOTAIR-<br>DNA | TTCT <u>AATACGACTCACTATA</u> GGA CTGCTGTGCTCTGGAGCTTGATCCG<br>AAAGCTTCCACAGTGAGGACTGCTCCGTGGGGGTAAGAGAGCACCAGGC<br>ACTGAGGCCTGGGAGTTCCACAGACCAACACCCCTGCTCCTGGCGGCTC                                                                                                                                                                                                                                                                                                          |

|               |                                                                                                                                                                                                                                                                                                                                                       |
|---------------|-------------------------------------------------------------------------------------------------------------------------------------------------------------------------------------------------------------------------------------------------------------------------------------------------------------------------------------------------------|
|               | <p>CCACCCGGGGCTTAGACCCTCAGGTCCTAATATCCCGGAGGTGCTCTC<br/> AATCAGAAAGGTCCTGCTCCGTTTCGCAGTGGAAATGGAACGGATTTAGAAG<br/> CCTGCAGTAGGGGAGTGGGGAGTGGAGAGAGGGAGCCCAGAGTTACAG<br/> ACGGCGGCGAGAGGAAGGAGGGGC</p>                                                                                                                                                 |
| HOTAIR<br>RNA | <p>GGACUCGCCUGUGCUCUGGAGCUUGAUCCGAAAGCUUCCACAGUGAG<br/> GACUGCUCGUGGGGGUAAGAGAGCACCAGGCACUGAGGCCUGGGAG<br/> UUCCACAGACCAACACCCCUGCUCCUGGCGGCUCCCACCCGGGGCUUA<br/> GACCCUCAGGUCCCUAAUAUCCCGGAGGUGCUCUCAUUCAGAAAGGUC<br/> CUGCUCGCUUCGCAGUGGAAUGGAACGGAUUUAGAAGCCUGCAGUAGG<br/> GGAGUGGGGAGUGGAGAGAGGGAGCCCAGAGUUACAGACGGCGGCGA<br/> GAGGAAGGAGGGGC</p> |

### **S3. References.**

1. Maiti A., Noon M.S., MacKerell A.D. Jr., Pozharski E., Drohat A.C. Lesion processing by a repair enzyme is severely curtailed by residues needed to prevent aberrant activity on undamaged DNA. *Proc. Natl. Acad. Sci. U S A.* 2012; 109, 8091-6.
2. Deckard C.E., Szczepanski J.T. Polycomb repressive complex 2 binds RNA irrespective of stereochemistry. *Chem. Commun.* 2018; 54, 12061-12064.
